# Supplementary material for: Study of Semen Quality, Reproductive Hormone Levels, and Lipid Levels in Men From Arkhangelsk, a City in North of European Russia
Source: PubMed Central journal article supplement — Am J Mens Health. 2020 Aug 19;14(4):1557988320939714. doi: 10.1177/1557988320939714 (PMC7444128; doi:10.1177/1557988320939714), 2020-08-19
Supplement: Supplementary_data_1.pdf [file Supplementary_data_1.pdf]

Table. Correlation coefficients for relationships between age, BMI, hormonal and lipid parameters (Spearman's test)

|                | Age                       | BMI                       | LH                        | FSH                       | TT                        | fT     | E <sub>2</sub>            | InhB   | SHBG                      | TG     | TC                       | HDL-C                     |
|----------------|---------------------------|---------------------------|---------------------------|---------------------------|---------------------------|--------|---------------------------|--------|---------------------------|--------|--------------------------|---------------------------|
| LH             | 0,114                     | -0.109                    |                           |                           |                           |        |                           |        |                           |        |                          |                           |
| FSH            | <b>0,409<sup>a</sup></b>  | 0.145                     | <b>0.381<sup>a</sup></b>  |                           |                           |        |                           |        |                           |        |                          |                           |
| TT             | <b>-0,205<sup>b</sup></b> | <b>-0.398<sup>a</sup></b> | <b>0.215<sup>b</sup></b>  | -0.132                    |                           |        |                           |        |                           |        |                          |                           |
| fT             | <b>-0,451<sup>a</sup></b> | -0.121                    | 0.043                     | <b>-0.287<sup>b</sup></b> | <b>0.506<sup>a</sup></b>  |        |                           |        |                           |        |                          |                           |
| E <sub>2</sub> | 0,186                     | <b>-0.243<sup>b</sup></b> | 0.141                     | -0.063                    | <b>0.246<sup>b</sup></b>  | 0.084  |                           |        |                           |        |                          |                           |
| InhB           | <b>-0,359<sup>a</sup></b> | -0.029                    | <b>-0.404<sup>a</sup></b> | <b>-0.566<sup>a</sup></b> | 0.059                     | 0.192  | <b>-0.303<sup>b</sup></b> |        |                           |        |                          |                           |
| SHBG           | 0,074                     | <b>-0.395<sup>a</sup></b> | <b>0.286<sup>b</sup></b>  | 0.083                     | <b>0.493<sup>a</sup></b>  | 0.035  | 0.028                     | 0.018  |                           |        |                          |                           |
| TG             | 0,120                     | <b>0.428<sup>a</sup></b>  | 0.010                     | -0.005                    | <b>-0.313<sup>b</sup></b> | -0.024 | -0.074                    | 0.044  | <b>-0.276<sup>b</sup></b> |        |                          |                           |
| TC             | <b>0,252<sup>b</sup></b>  | <b>0.256<sup>b</sup></b>  | -0.025                    | 0.194                     | -0.217                    | 0.011  | -0.184                    | 0.113  | -0.110                    | 0.185  |                          |                           |
| HDL-C          | 0,035                     | <b>-0.257<sup>b</sup></b> | 0.048                     | 0.073                     | 0.124                     | -0.003 | <b>0.282<sup>b</sup></b>  | -0.031 | -0.020                    | -0.184 | 0.059                    |                           |
| LDL-C          | 0,160                     | <b>0.229<sup>b</sup></b>  | -0.071                    | 0.154                     | -0.168                    | 0.020  | <b>-0.229<sup>b</sup></b> | 0.132  | -0.032                    | -0.059 | <b>0.871<sup>a</sup></b> | <b>-0.245<sup>b</sup></b> |

Abbreviations: BMI, body mass index; LH, luteinizing hormone; FSH, follicle-stimulating hormone; TT, total testosterone; fT, free testosterone; E<sub>2</sub>, estradiol; InhB, inhibin B; SHBG, sex hormone-binding globulin; TG, triglyceride; TC, total cholesterol; HDL-C, high-density lipoprotein cholesterol; LDL-C, low-density lipoprotein cholesterol. <sup>a</sup>,  $p \leq 0.001$ ; <sup>b</sup>,  $p \leq 0.05$ .

Table. Correlation coefficients for relationships between semen quality variables and age, anthropometric, hormonal and metabolic parameters (Spearman's test)

| Variable    | Semen volume | Sperm concentration       | Total sperm count | Progressive motility      | Normal morphology |
|-------------|--------------|---------------------------|-------------------|---------------------------|-------------------|
| Age         | -0.098       | 0.095                     | 0.087             | -0.043                    | -0.018            |
| WC          | -0.128       | 0.083                     | 0.015             | 0.005                     | 0.074             |
| HC          | -0.076       | -0.094                    | -0.098            | -0.159                    | -0.050            |
| WHR         | -0.126       | 0.096                     | 0.013             | 0.071                     | 0.086             |
| WHtR        | -0.193       | 0.083                     | -0.010            | 0.032                     | 0.082             |
| BMI         | -0.108       | -0.008                    | -0.045            | -0.029                    | 0.025             |
| <b>LH</b>   | 0.152        | <b>-0.273<sup>a</sup></b> | -0.102            | <b>-0.265<sup>b</sup></b> | -0.150            |
| FSH         | -0.078       | -0.136                    | -0.103            | -0.191                    | -0.151            |
| TT          | 0.091        | 0.045                     | 0.070             | 0.092                     | 0.168             |
| fT          | 0.107        | 0.006                     | 0.033             | 0.031                     | 0.97              |
| E2          | 0.146        | -0.132                    | -0.042            | -0.158                    | -0.062            |
| <b>InhB</b> | -0.048       | <b>0.290<sup>a</sup></b>  | 0.173             | <b>0.346<sup>a</sup></b>  | 0.180             |
| SHBG        | -0.174       | 0.046                     | -0.046            | 0.104                     | 0.146             |
| TG          | 0.067        | -0.078                    | -0.045            | -0.070                    | 0.018             |
| TC          | -0.084       | -0.027                    | -0.063            | -0.106                    | -0.134            |
| HDL-C       | 0.153        | 0.021                     | 0.101             | -0.001                    | -0.109            |
| LDL-C       | -0.126       | 0.007                     | -0.050            | -0.068                    | -0.097            |

Abbreviations: WC, waist circumference; HC, hip circumference; WHR, waist to hip ratio; WHtR, waist to height ratio; BMI, body mass index; LH, luteinizing hormone; FSH, follicle-stimulating hormone; TT, total testosterone; fT, free testosterone; E2, estradiol; InhB, inhibin B; SHBG, sex hormone-binding globulin; TG, triglyceride; TC, total cholesterol; HDL-C, high-density lipoprotein cholesterol; LDL-C, low-density lipoprotein cholesterol. <sup>a</sup>,  $p \leq 0.01$ ; <sup>b</sup>,  $p \leq 0.05$ .
